# Supplementary material for: Pseudocapacitive porous hard carbon anode with controllable pyridinic nitrogen and thiophene sulfur co-doping for high-power dual-carbon sodium ion hybrid capacitors
Source: Royal Society of Chemistry journal article supplement (doi:10.1039/d1ta05755c), 2021-01-01
Supplement: d1ta05755c1.pdf [file d1ta05755c1.pdf]

## Supporting Information

### Pseudocapacitive Porous Hard Carbon Anode with Controllable Pyridinic Nitrogen and Thiophene Sulfur Co-doping for High- power Dual-carbon Sodium Ion Hybrid Capacitors

Chong Wang,<sup>a</sup> Ning Zhao,<sup>a</sup> Bohan Li,<sup>a</sup> Qingtao Yu,<sup>a</sup> Wanci Shen,<sup>a</sup> Feiyu Kang,<sup>a,b</sup> Ruitao Lv,<sup>\*a</sup>  
and Zheng-Hong Huang<sup>\*a,b</sup>

<sup>a</sup> State Key Laboratory of New Ceramics and Fine Processing, School of Materials Science and  
Engineering, Tsinghua University, Beijing 100084, China

<sup>b</sup> Engineering Laboratory for Functionalized Carbon Materials, Shenzhen Key Laboratory for  
Graphene-based Materials, Graduate School at Shenzhen, Tsinghua University, Shenzhen  
518055, China

<sup>c</sup> Key Laboratory of Advanced Materials (MOE), School of Materials Science and Engineering,  
Tsinghua University, Beijing 100084, China

E-mail: zhhuang@mail.tsinghua.edu.cn

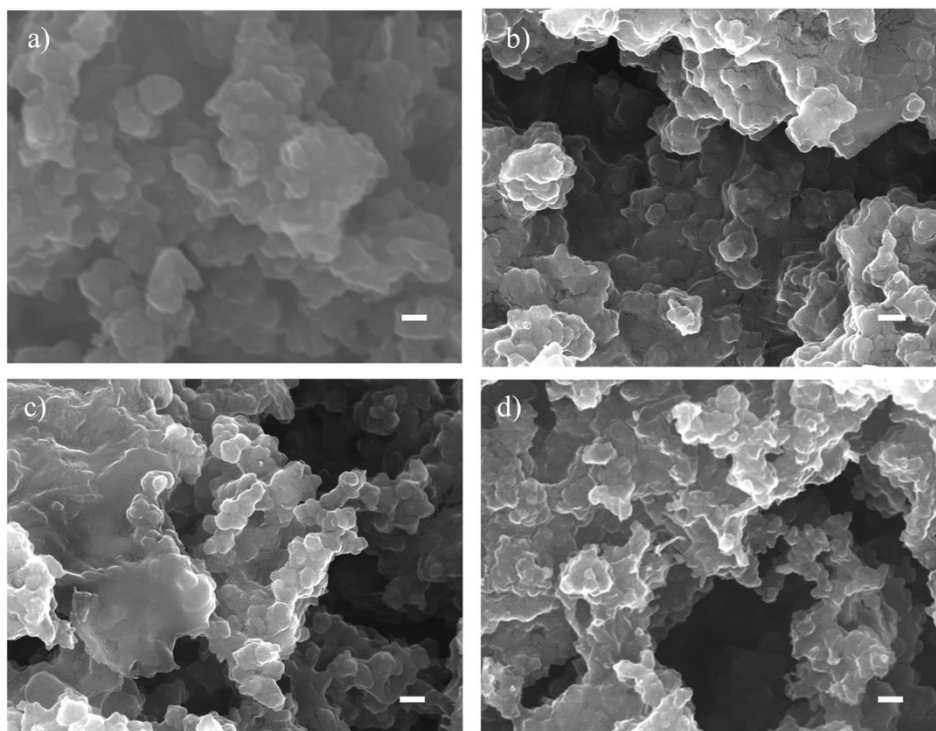

**Fig. S1.** The SEM images of (a) N-HC, (b) NS-pHC-0.337, (c) NS-pHC-0.674, (d) NS-pHC-1.348. The scale bar is 200 nm.

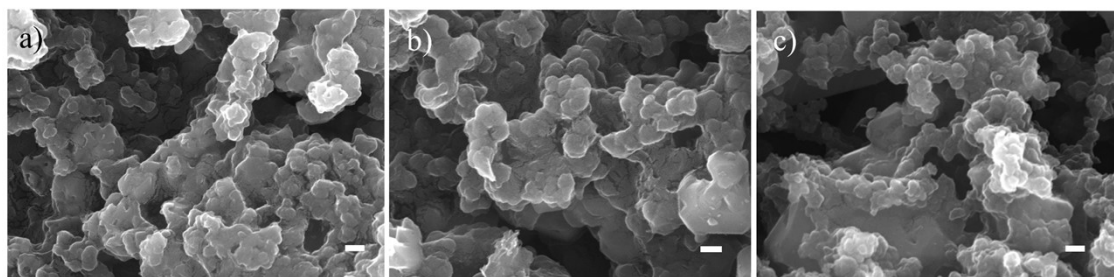

**Fig. S2.** The SEM of (a) NS-pHC-Mg-0.337, (b) NS-pHC-Mg-0.674, (c) NS-pHC-Mg-1.348. The scale bar is 200 nm.

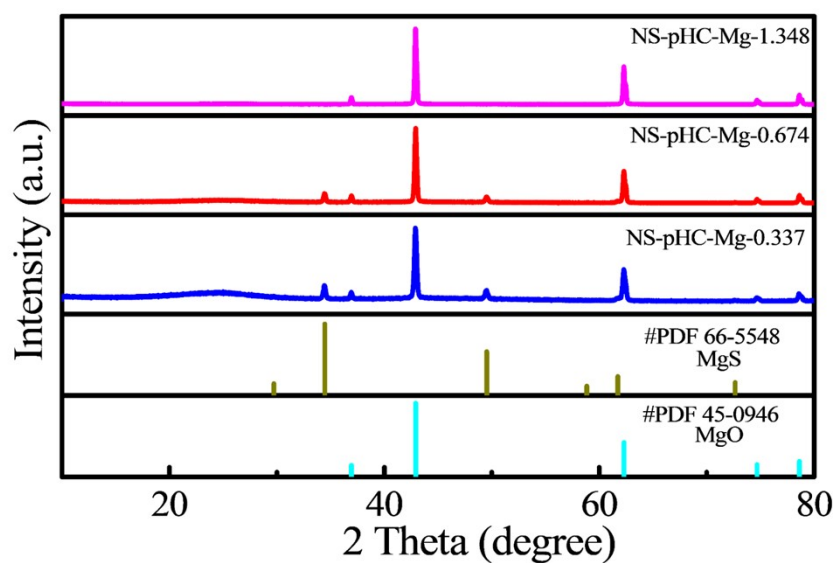

**Fig. S3.** The XRD patterns of NS-pHC-Mg-x.

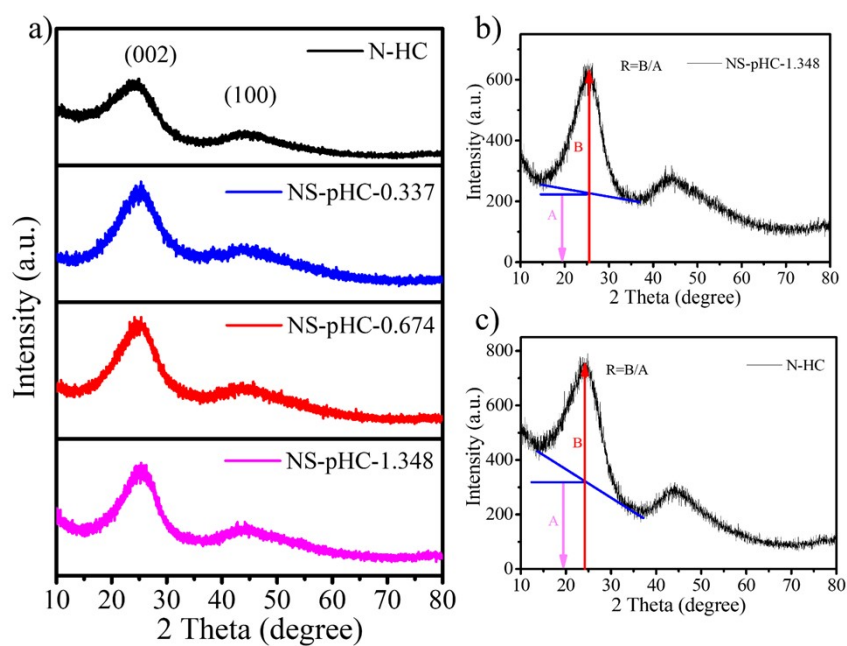

**Fig. S4.** (a) The XRD patterns of N-HC and NS-pHC-x. The calculated manner of R value for (b) NS-pHC-1.348 and (c) N-HC.

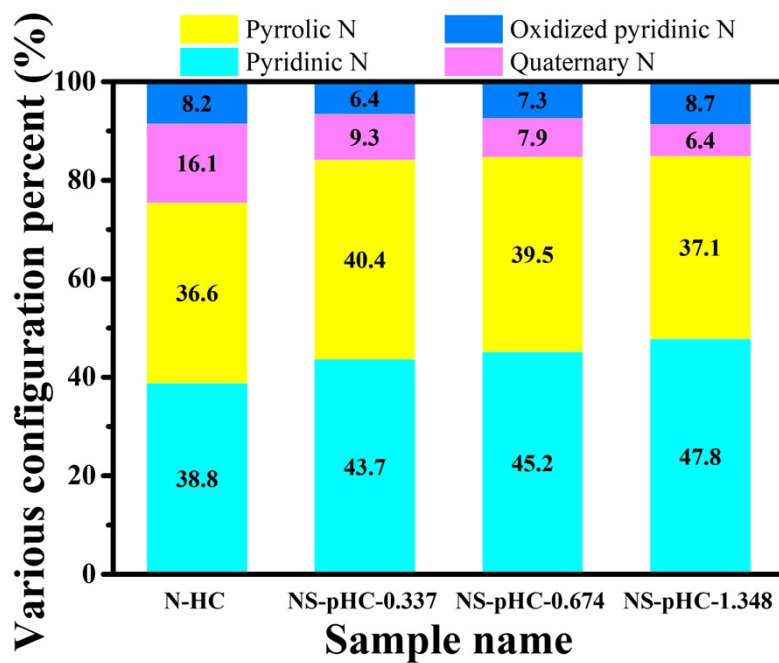

**Fig. S5.** The ratios of various configurations of nitrogen dopants for N-HC and NS-pHC-x.

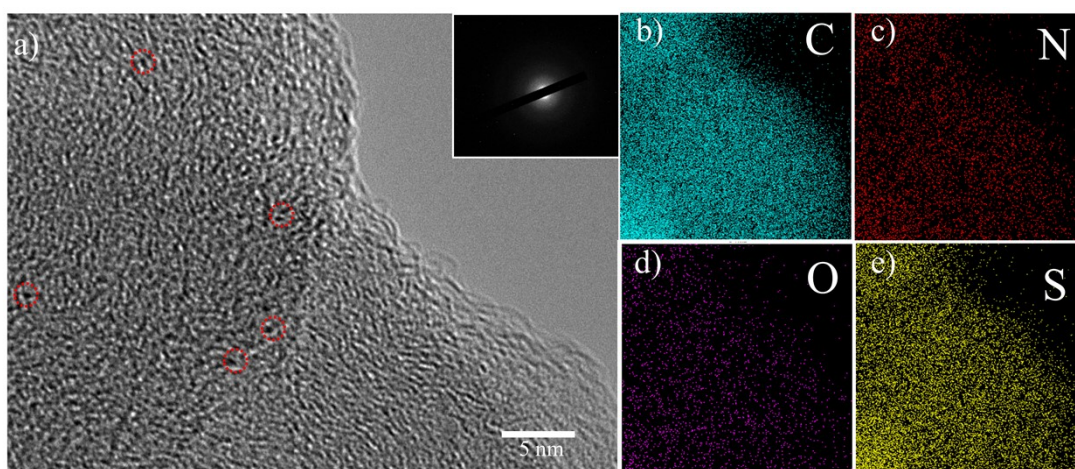

**Fig. S6.** The HRTEM (a) of NS-pHC-1.348. The HRTEM element distribution of (b) carbon, (c) nitrogen, (d) oxygen and (e) sulfur.

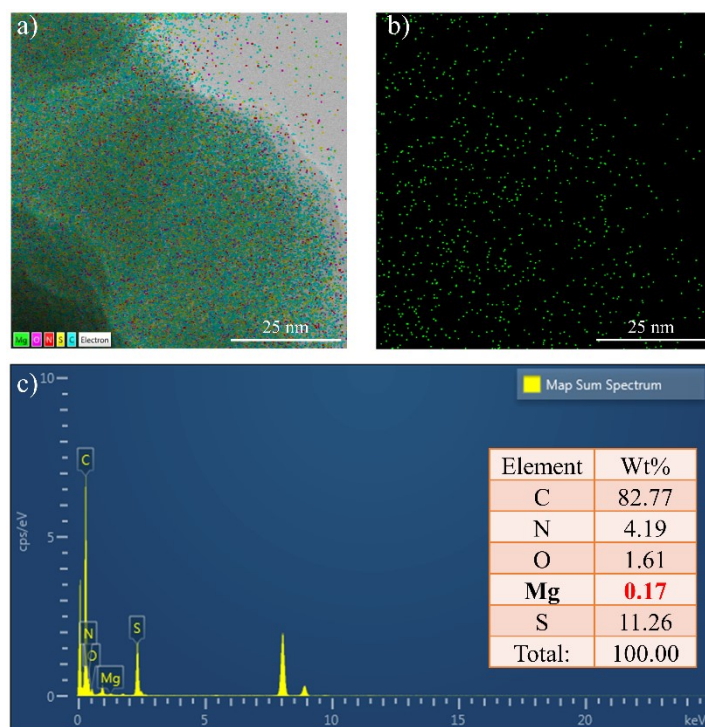

**Fig. S7.** The HRTEM element distribution of (a) total elements and (b) Mg element in NS-pHC-1.348. (c) The map sum spectrum of total elements (The relative ratios of C, N, O were different from that obtained from XPS data because elemental mapping is less sensitive to the light elements with a small weight difference).

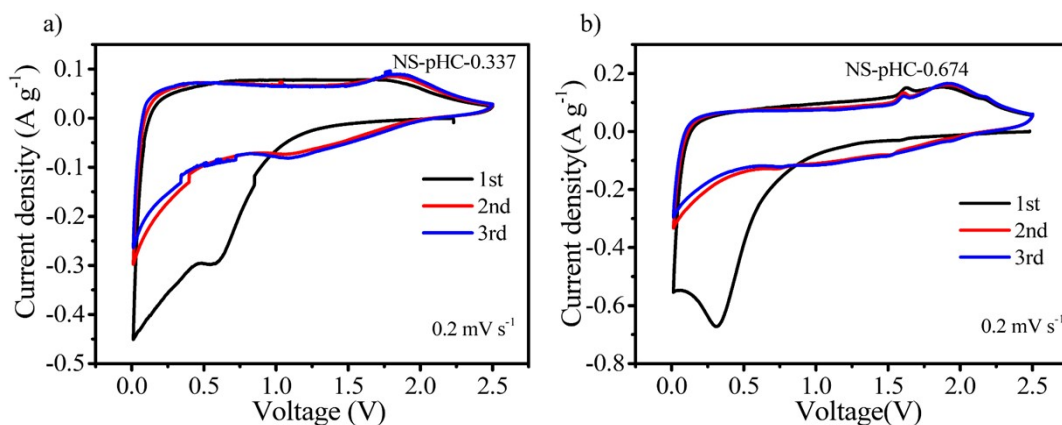

**Fig. S8.** The CV curves of first 3 cycles at  $0.2 \text{ mV s}^{-1}$ . (a) NS-pHC-0.337, (b) NS-pHC-0.674.

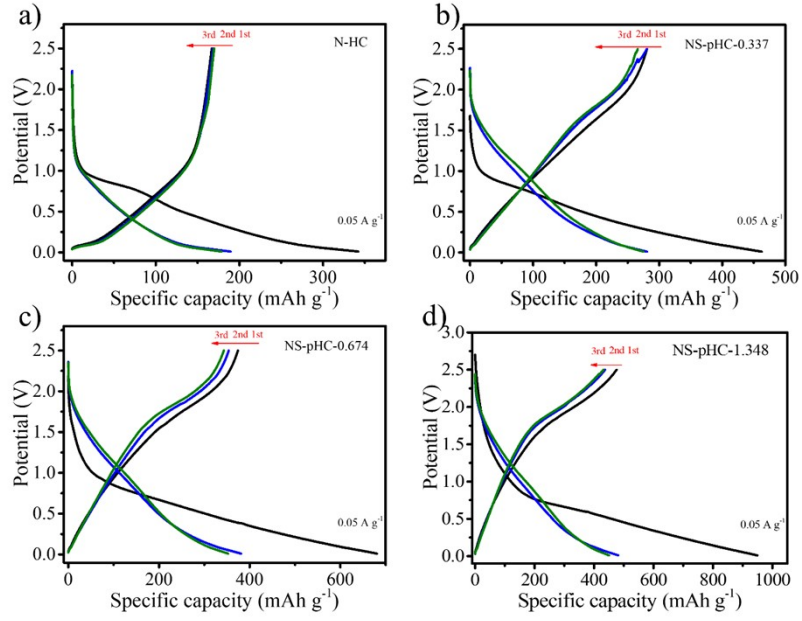

**Fig. S9.** The GCD curves of first 3 cycles at  $0.05 \text{ A g}^{-1}$ . (a) N-HC, (b) NS-pHC-0.337, (c) NS-pHC-0.674, (d) NS-pHC-1.348.

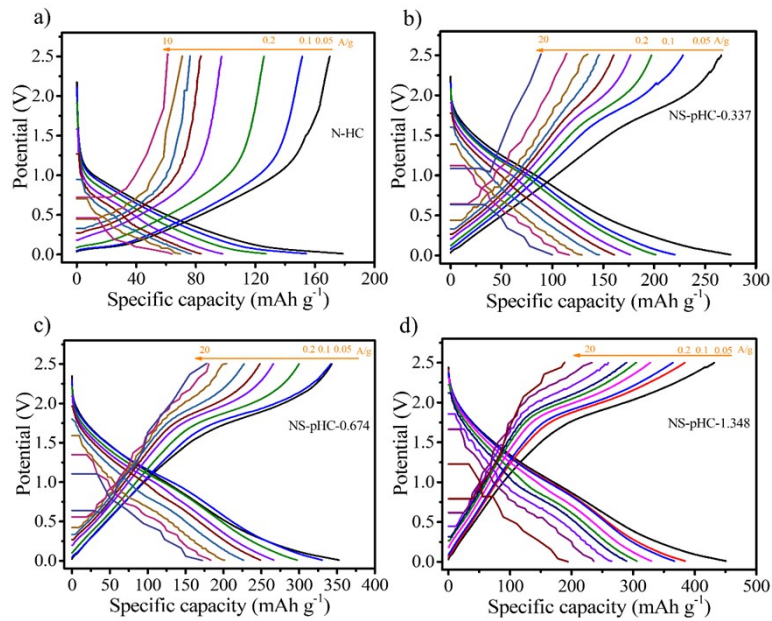

**Fig. S10.** The GCD curves at different current densities. (a) N-HC, (b) NS-pHC-0.337, (c) NS-pHC-0.674, (d) NS-pHC-1.348.

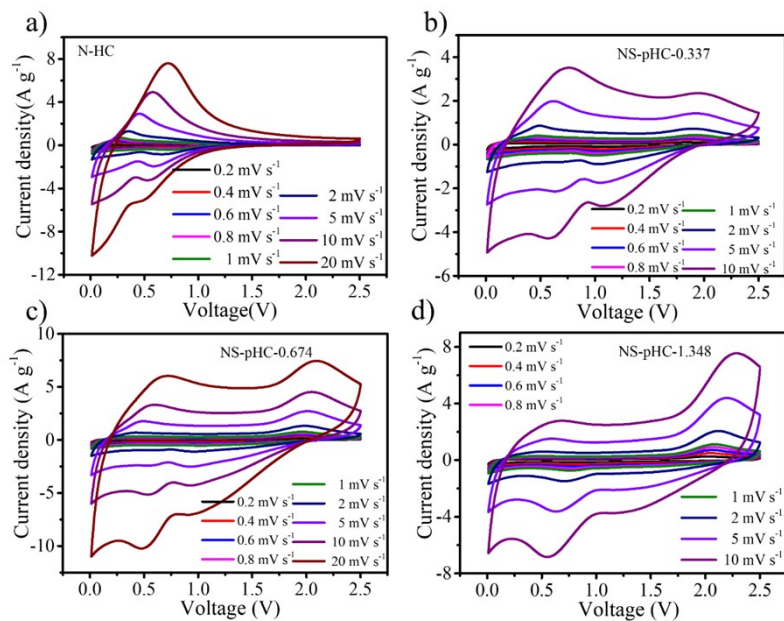

**Fig. S11.** The CV curves at different scan speeds. (a) N-HC, (b) NS-pHC-0.337, (c) NS-pHC-0.674, (d) NS-pHC-1.348.

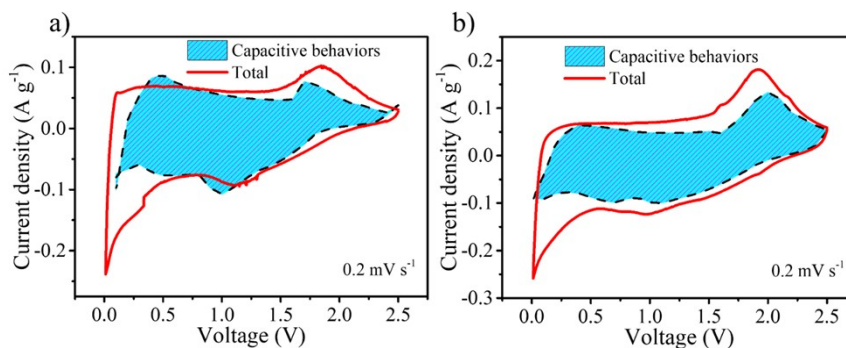

**Fig. S12.** The capacitive contribution (blue dashed area) of (a) NS-pHC-0.337 and (b) NS-pHC-0.674 at  $0.2 \text{ mV s}^{-1}$ .

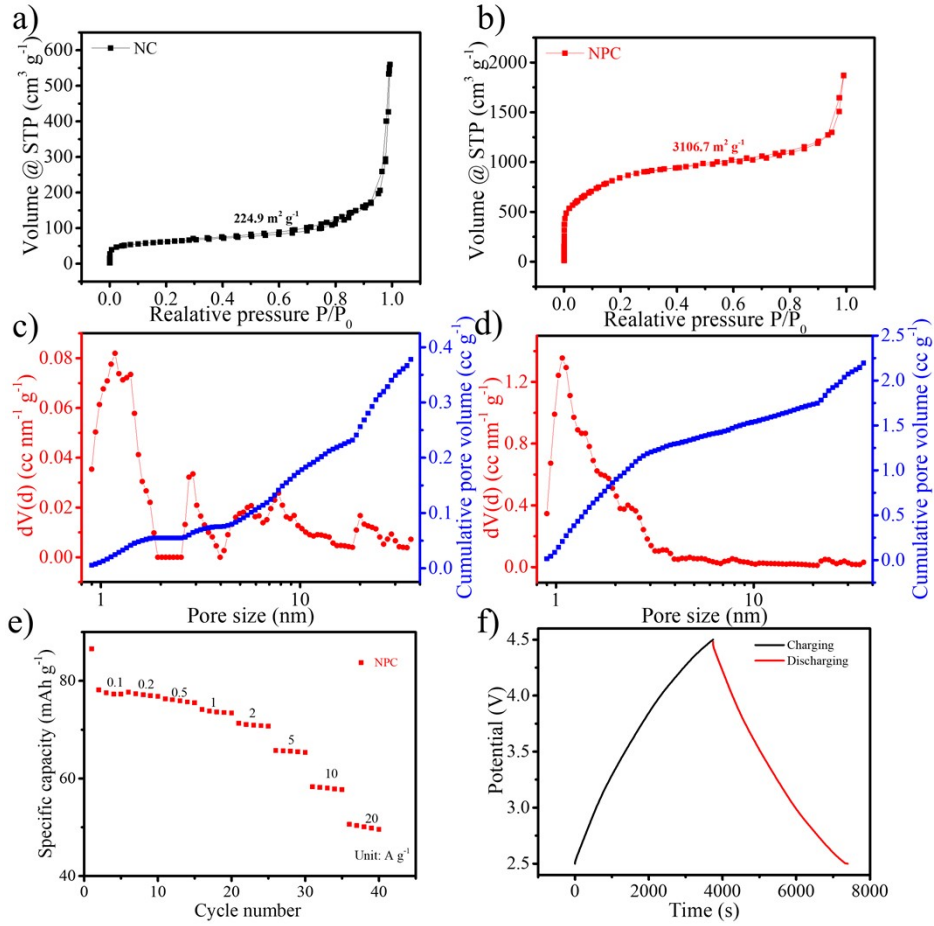

**Fig. S13.** The nitrogen adsorption/desorption curves of (a) NC and (b) NPC. The pore size distribution of (c) NC and (d) NPC. The rate performance (e) from 0.1 A g<sup>-1</sup> to 20 A g<sup>-1</sup> and GCD curve (f) at 0.1 A g<sup>-1</sup> of NPC.

**Table S1.** The structural parameters of N-HC and NS-pHC-x samples.

| Sample       | 2 Theta <sub>(002)</sub> | SSA m <sup>2</sup> g <sup>-1</sup> | Micropores size | Mesopores size | I <sub>b</sub> /I <sub>g</sub> |
|--------------|--------------------------|------------------------------------|-----------------|----------------|--------------------------------|
|              |                          |                                    | nm              | nm             |                                |
| N-HC         | 24.9°                    | 41.2                               | 1.7             | /              | 2.44                           |
| NS-pHC-0.337 | 25.3°                    | 88.1                               | 1.40            | /              | 2.46                           |
| NS-pHC-0.674 | 25.3°                    | 566.2                              | 1.07            | 2-4            | 2.75                           |
| NS-pHC-1.348 | 25.5°                    | 854.5                              | 1.07            | 2-4            | 2.97                           |



**Table S2.** The surface chemical state parameters of N-HC and NS-pHC-x samples.

| Sample       | Pyridinic N<br>(at%) | Pyrrolic N<br>(at%) | Quaternary N<br>(at%) | C-S-C<br>(at%) | Total N<br>(at%) | Total S<br>(at%) |
|--------------|----------------------|---------------------|-----------------------|----------------|------------------|------------------|
| N-HC         | 4.68                 | 4.42                | 1.95                  | 0.39           | 12.07            | 0.78             |
| NS-pHC-0.337 | 5.04                 | 4.66                | 1.08                  | 3.45           | 11.54            | 4.36             |
| NS-pHC-0.674 | 4.98                 | 4.35                | 0.87                  | 5.52           | 11.02            | 6.11             |
| NS-pHC-1.348 | 5.41                 | 4.20                | 0.72                  | 7.12           | 11.31            | 7.77             |

**Table S3.** The comparison of ICE and rate performance of NS-pHC-1.348 with those reported in the literatures.

| Sample                                                  | ICE    | Capacity mAh g <sup>-1</sup><br>(Current density A g <sup>-1</sup> ) | Reference                                                  |
|---------------------------------------------------------|--------|----------------------------------------------------------------------|------------------------------------------------------------|
| NS-pHC-1.348                                            | 49.99% | <b>383.9 (0.05); 183.2 (20)</b>                                      | This work                                                  |
| N, S co-doped nanoporous carbon                         | 47.7%  | 322 (0.2); 172 (10)                                                  | [1] <i>Energy Storage Mater</i> 2018, <b>11</b> , 274-281. |
| N, S co-doped carbon microspheres                       | ≈80.8% | 210 (0.1); 131 at (5)                                                | [2] <i>Adv Energy Mater</i> 2016, <b>6</b> , 1501929.      |
| S, N co-doped mesoporous hollow carbon spheres          | 29%    | 240 (0.5); 138 (30)                                                  | [3] <i>Adv Energy Mater</i> 2019, <b>9</b> , 1900036.      |
| S-enriched N doped multichannel hollow carbon nanofiber | 62%    | 329 (0.05); 132 (10)                                                 | [4] <i>Small</i> 2018, <b>14</b> , e1802218.               |
| S-doped N-rich carbon nanosheets                        | ≈43.9% | 350 (0.05); 110 (10)                                                 | [5] <i>Adv Mater</i> 2017, <b>29</b> , 1604108.            |
| N, S co-doped porous carbon nanosheets                  | 34.4%  | 294.6 (0.1); 176 (2)                                                 | [6] <i>Chem Eng J</i> 2019, <b>364</b> , 208-216.          |
| N, S co-doped graphene nanosheets                       | 50.86% | 400 (0.03); 141 (5)                                                  | [7] <i>Energy Storage Mater</i> 2018, <b>13</b> , 134-141. |

**Table S4.** The electrochemical property parameters of N-HC and NS-pHC-x.

| Sample       | ICE    | Capacity mAh g <sup>-1</sup><br>(Current density A g <sup>-1</sup> ) | Cycle (at<br>1 A g <sup>-1</sup> ) | Capacity proportion<br>below 0.1 V at 3 <sup>rd</sup><br>cycle at 0.05 A g <sup>-1</sup> | Capacitive<br>behaviors<br>proportion at 0.2<br>mV s <sup>-1</sup> |
|--------------|--------|----------------------------------------------------------------------|------------------------------------|------------------------------------------------------------------------------------------|--------------------------------------------------------------------|
| N-HC         | 48.81% | 161.2 (0.05); 33.3 (20)                                              | 81.3<br>(102%)                     | 52.9 (29.6%)                                                                             | 49.82%                                                             |
| NS-pHC-0.337 | 60.65% | 241.3 (0.05); 88.9 (20)                                              | 169.7<br>(84.8%)                   | 38.3 (13.9%)                                                                             | 72.04%                                                             |
| NS-pHC-0.674 | 54.96% | 327.9 (0.05); 172.2 (20)                                             | 199<br>(79.5%)                     | 46.2 (13.1%)                                                                             | 68.59%                                                             |
| NS-pHC-1.348 | 49.99% | 383.9 (0.05); 183.2 (20)                                             | 287.2<br>(87.0%)                   | 54.7 (11.7%)                                                                             | 70.19%                                                             |

## REFERENCES

- 1 Y. Liu, Y. Qiao, G. Wei, S. Li, Z. Lu, X. Wang and X. Lou, *Energy Storage Mater.*, 2018, **11**, 274-281.
- 2 D. F. Xu, C. J. Chen, J. Xie, B. Zhang, L. Miao, J. Cai, Y. H. Huang and L. N. Zhang, *Adv. Energy Mater.*, 2016, **6**, 1501929.
- 3 D. Ni, W. Sun, Z. Wang, Y. Bai, H. Lei, X. Lai and K. Sun, *Adv. Energy Mater.*, 2019, **9**, 1900036.
- 4 X. Sun, C. Wang, Y. Gong, L. Gu, Q. Chen and Y. Yu, *Small*, 2018, **14**, e1802218.
- 5 J. Yang, X. Zhou, D. Wu, X. Zhao and Z. Zhou, *Adv. Mater.*, 2017, **29**, 1604108.
- 6 X. Miao, D. Sun, X. Zhou and Z. Lei, *Chem. Eng. J.*, 2019, **364**, 208-216.
- 7 Y. Ma, Q. Guo, M. Yang, Y. Wang, T. Chen, Q. Chen, X. Zhu, Q. Xia, S. Li and H. Xia, *Energy Storage Mater.*, 2018, **13**, 134-141.
